# Supplementary material for: Marine anoxia initiates giant sulfur-bacteria mat proliferation and associated changes in benthic nitrogen, sulfur, and iron cycling in the Santa Barbara Basin, California Borderland
Source: Copernicus journal article supplement (doi:10.5194/egusphere-2023-1198), 2023-06-19
Supplement: Supplementary file 1 [file egusphere-2023-1198-supplement.pdf]

## Supplementary Material

### **Marine anoxia initiates giant sulfur-bacteria mat proliferation and associated changes in benthic nitrogen, sulfur, and iron cycling in the Santa Barbara Basin, California**

#### **Borderland**

David J. Yousavich<sup>1\*</sup>, De'Marcus Robinson<sup>2</sup>, Xuefeng Peng<sup>3</sup>, Sebastian J. E. Krause<sup>1,4</sup>, Frank Wenzhoefer<sup>5,6,7</sup>, Felix Janßen<sup>4,5</sup>, Na Liu<sup>8</sup>, Jonathan Tarn<sup>8</sup>, Frank Kinnaman<sup>8</sup>, Dave Valentine<sup>8</sup>, Tina Treude<sup>1,2\*</sup>

<sup>1</sup>Department of Earth, Planetary, and Space Sciences, University of California Los Angeles, 595 Charles E. Young Drive East, Los Angeles, CA 90095, USA

<sup>2</sup>Department of Atmospheric and Oceanic Sciences, University of California Los Angeles, Math Science Building, 520 Portola Plaza, Los Angeles, CA 90095, USA

<sup>3</sup>School of Earth, Ocean, and Environment, University of South Carolina, 701 Sumter Street, EWS 617, Columbia, SC 29208, USA

<sup>4</sup>Earth Research Institute, 6832 Ellison Hall, University of California Santa Barbara, Ca 93106-3060

<sup>5</sup>HGF-MPG Joint Research Group for Deep-Sea Ecology and Technology, Alfred-Wegener-Institute, Helmholtz-Center for Polar and Marine Research, Am Handelshafen 12, 27570 Bremerhaven, Germany

<sup>6</sup>Max Planck Institute for Marine Microbiology, Celsiusstrasse 1, 28359 Bremen, Germany

<sup>7</sup>Department of Biology, DIAS, Nordcee and HADAL Centres, University of Southern Denmark, 5230 Odense M, Denmark

<sup>8</sup>Department of Earth Science and Marine Science Institute, University of California, Santa Barbara, CA 93106, USA

**Correspondence:** David Yousavich (yousavdj@ucla.edu), Tina Treude (ttreude@g.ucla.edu)

**Supplemental Table 1:** Porewater nitrite concentrations taken from sediment cores at SDRO and SDT3-A. Nitrite was below detection in sediment cores for all other stations; n.d. = not determined.

| Sediment Depth | SDRO [NO <sub>2</sub> <sup>-</sup> ] | SDT3A [NO <sub>2</sub> <sup>-</sup> ] |
|----------------|--------------------------------------|---------------------------------------|
| [cm]           | [μmol L <sup>-1</sup> ]              | [μmol L <sup>-1</sup> ]               |
| -1             | 1.1                                  | 0.0                                   |
| 0.5            | 36.6                                 | 5.2                                   |
| 1.5            | 1.4                                  | 1.7                                   |
| 2.5            | 1.1                                  | 0.7                                   |
| 3.5            | 1.1                                  | 0.0                                   |
| 4.5            | 1.2                                  | 0.0                                   |
| 5.5            | 0.0                                  | 0.0                                   |
| 6.5            | 6.1                                  | 0.0                                   |
| 7.5            | 4.3                                  | 0.0                                   |
| 8.5            | 0.0                                  | 0.0                                   |
| 9.5            | 0.0                                  | 0.0                                   |
| 11             | 0.0                                  | n.d.                                  |
| 13             | 0.0                                  | n.d.                                  |
| 15             | 0.0                                  | 0.0                                   |
| 17             | 0.0                                  | 0.0                                   |
| 19             | n.d.                                 | 0.0                                   |

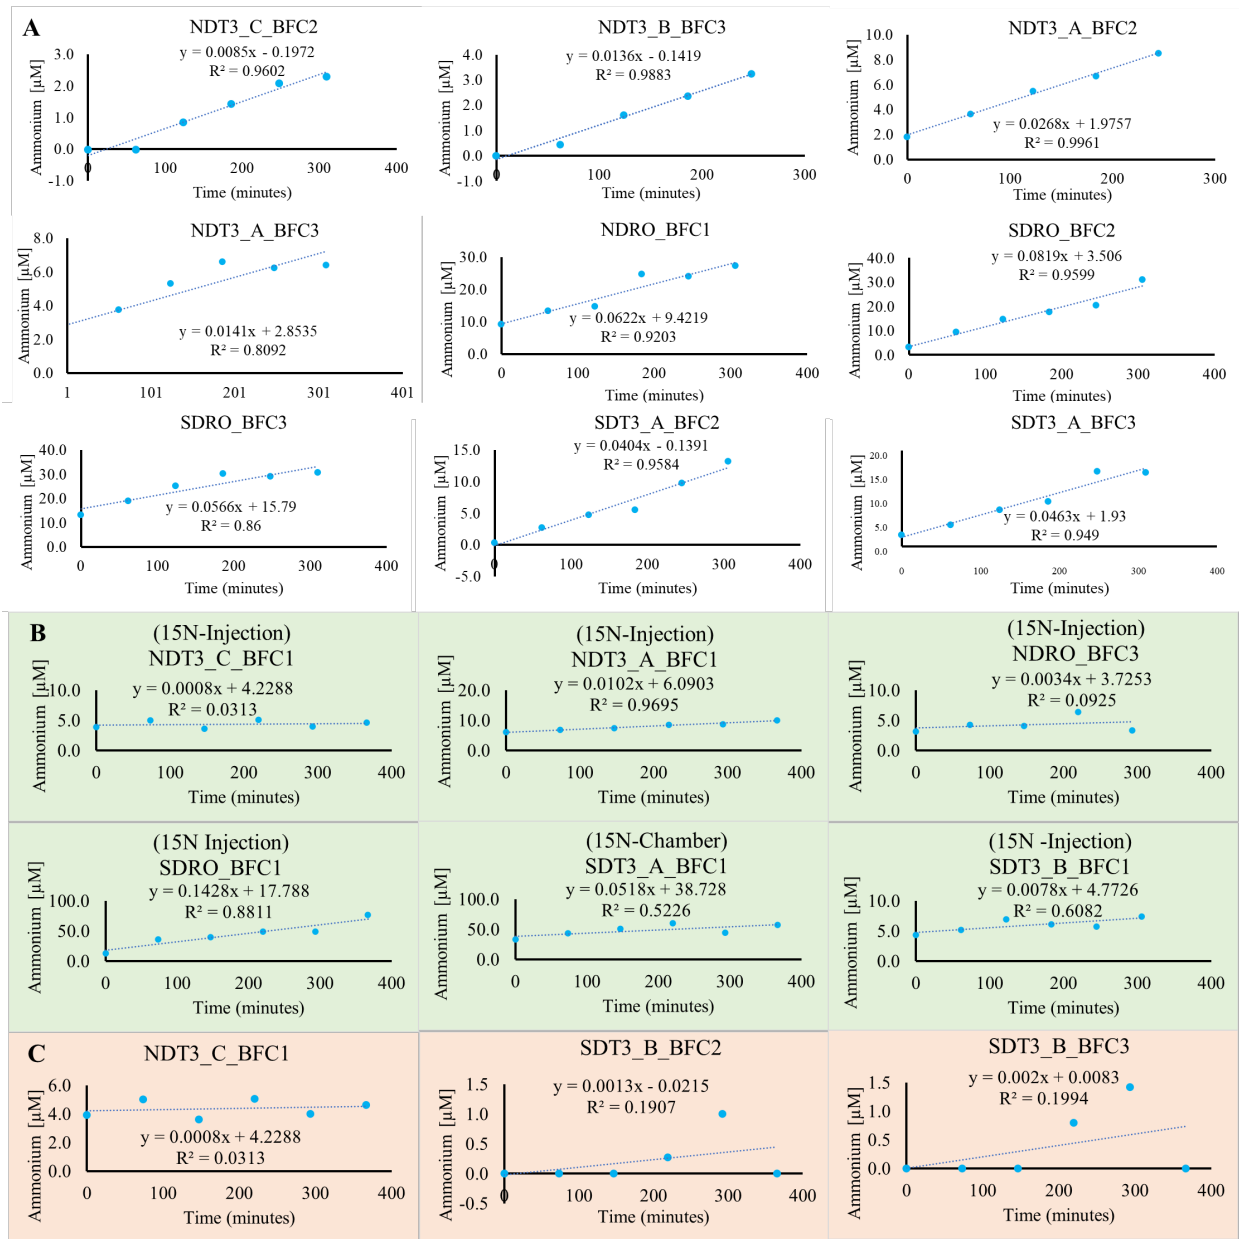

**Supplemental Figure 1:** A/white) Ammonium concentration changes over time from benthic flux chamber (BFC1, BFC2, BFC3) incubations. B/green) Ammonium concentration changes over time from <sup>15</sup>N-Nitrate benthic flux chamber incubations. Note these chambers were not used to calculate benthic fluxes. C/red) Ammonium concentration changes over time from benthic flux chamber incubations where there was no calculatable flux. No data are shown from chambers if there was a mechanical failure with the deployment or ammonium concentrations were all below detection. For station abbreviation definitions please refer to the main manuscript.

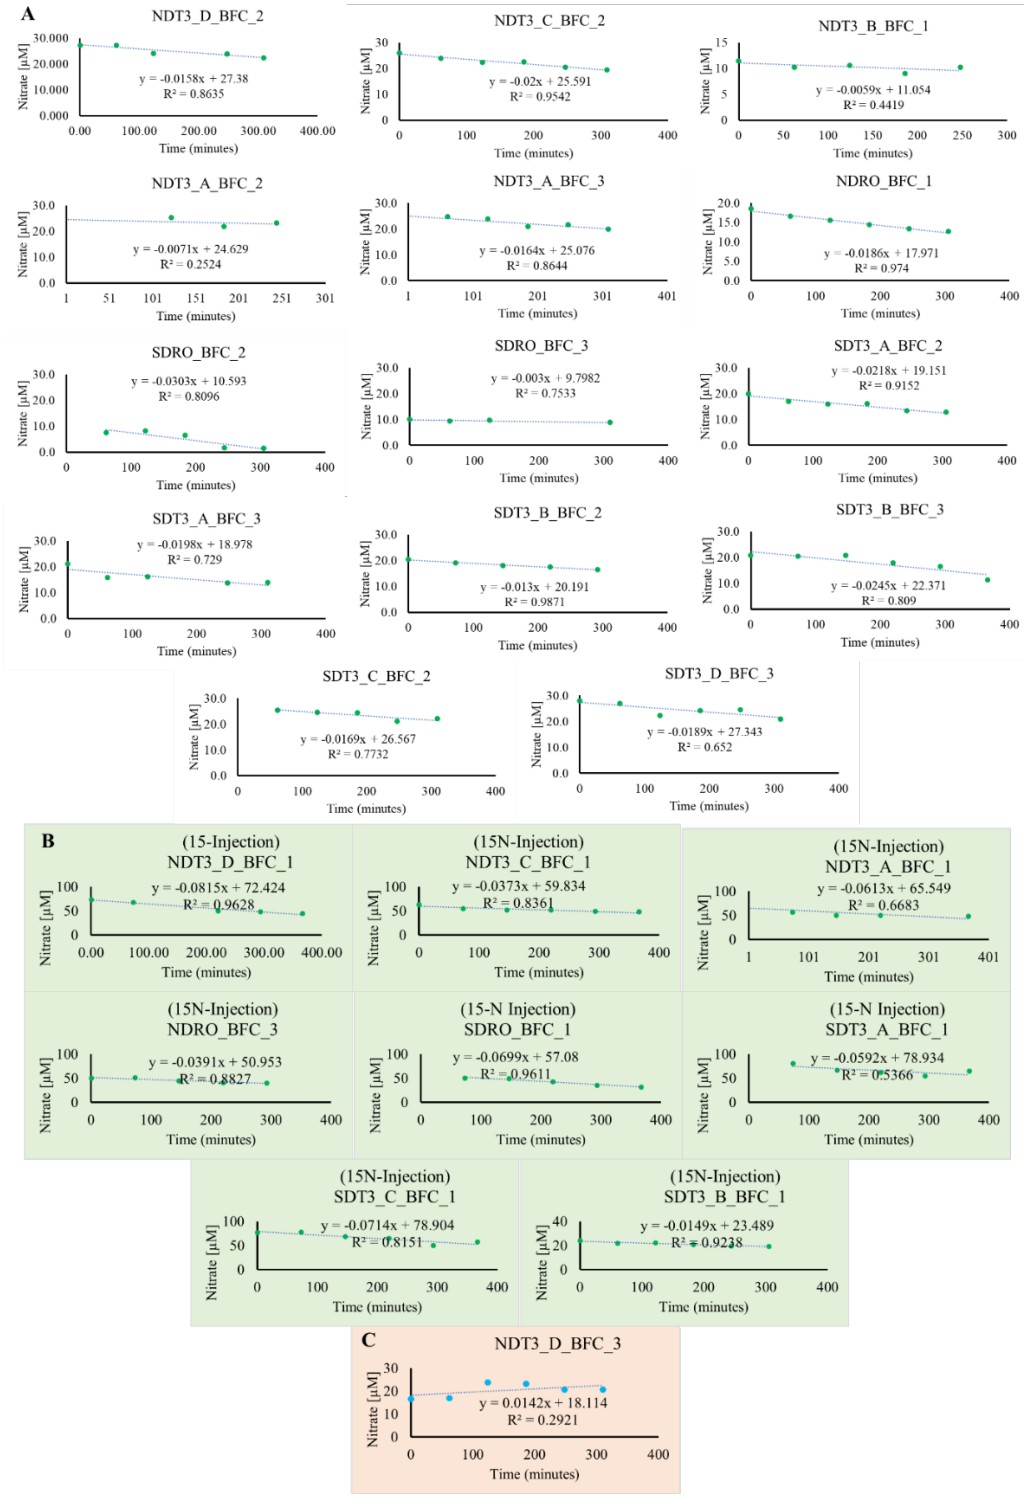

**Supplemental Figure 2:** A/white) Nitrate concentration changes over time from benthic flux chamber (BFC1, BFC2, BFC3) incubations. B/green) Nitrate concentration changes over time from <sup>15</sup>N-Nitrate benthic flux chamber incubations. Note these chambers were not used to calculate benthic fluxes. C/red) Nitrate concentration changes over time from benthic flux chamber incubations where there was no calculatable flux. No data are shown from chambers if there was a mechanical failure with the deployment. For station abbreviation definitions please refer to the main manuscript.

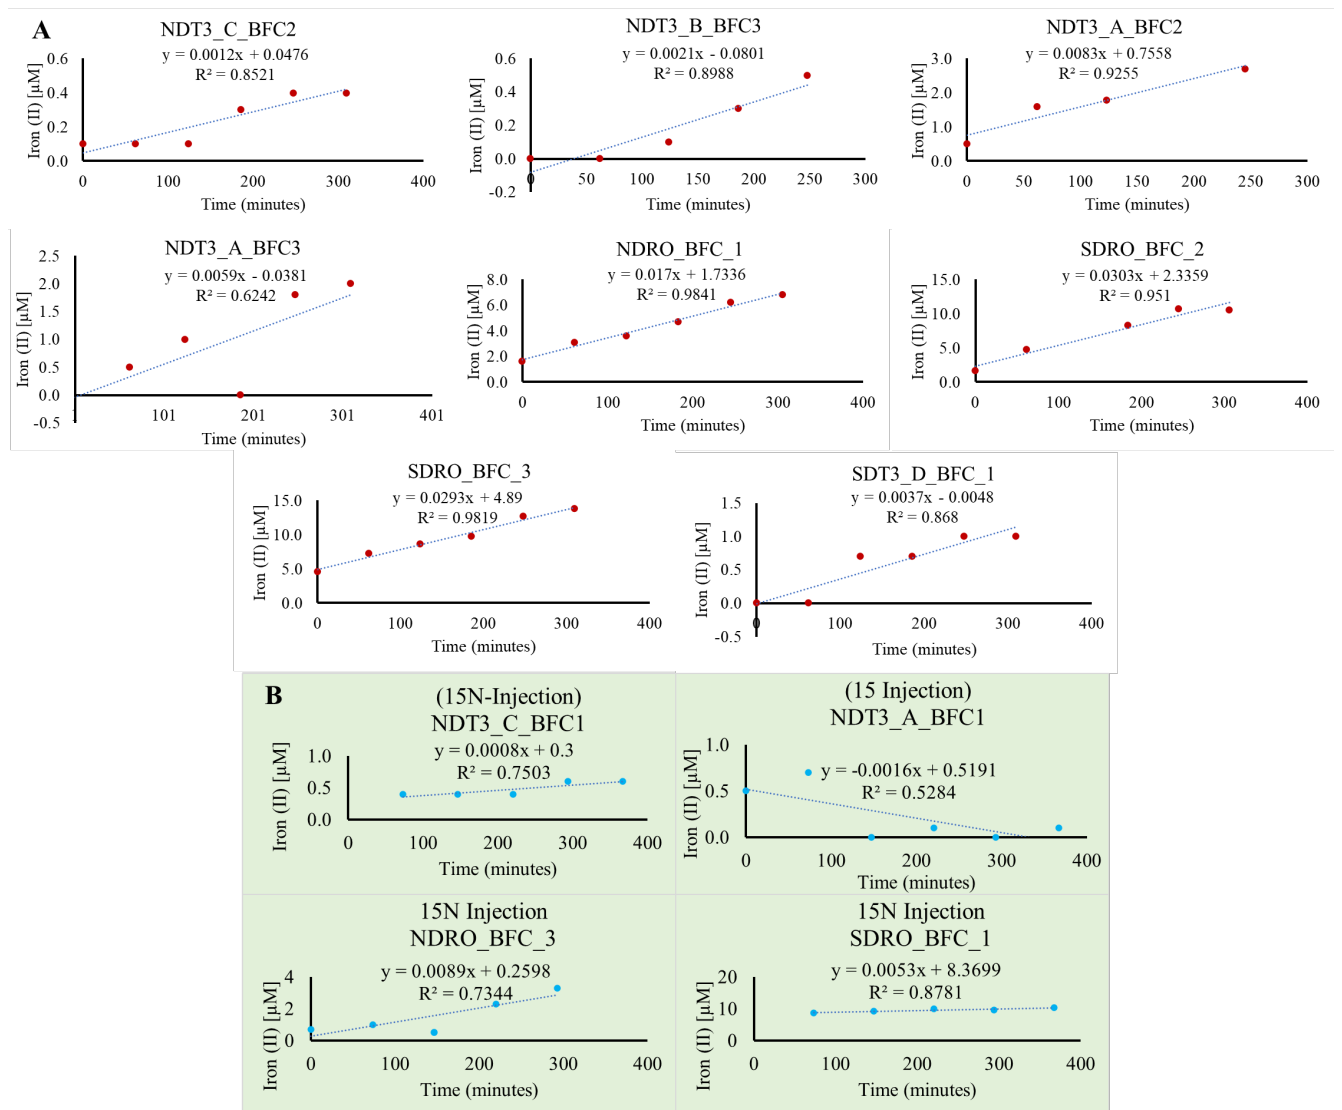

**Supplemental Figure 3:** A/white) Iron (II) concentration changes over time from benthic flux chamber (BFC1, BFC2, BFC3) incubations. B/green) Iron (II) concentration changes over time from  $^{15}\text{N}$ -Nitrate benthic flux chamber incubations. Note these chambers were not used to calculate benthic fluxes. No data are shown from chambers if there was a mechanical failure with the deployment or concentrations were all below detection. For station abbreviation definitions please refer to the main manuscript.

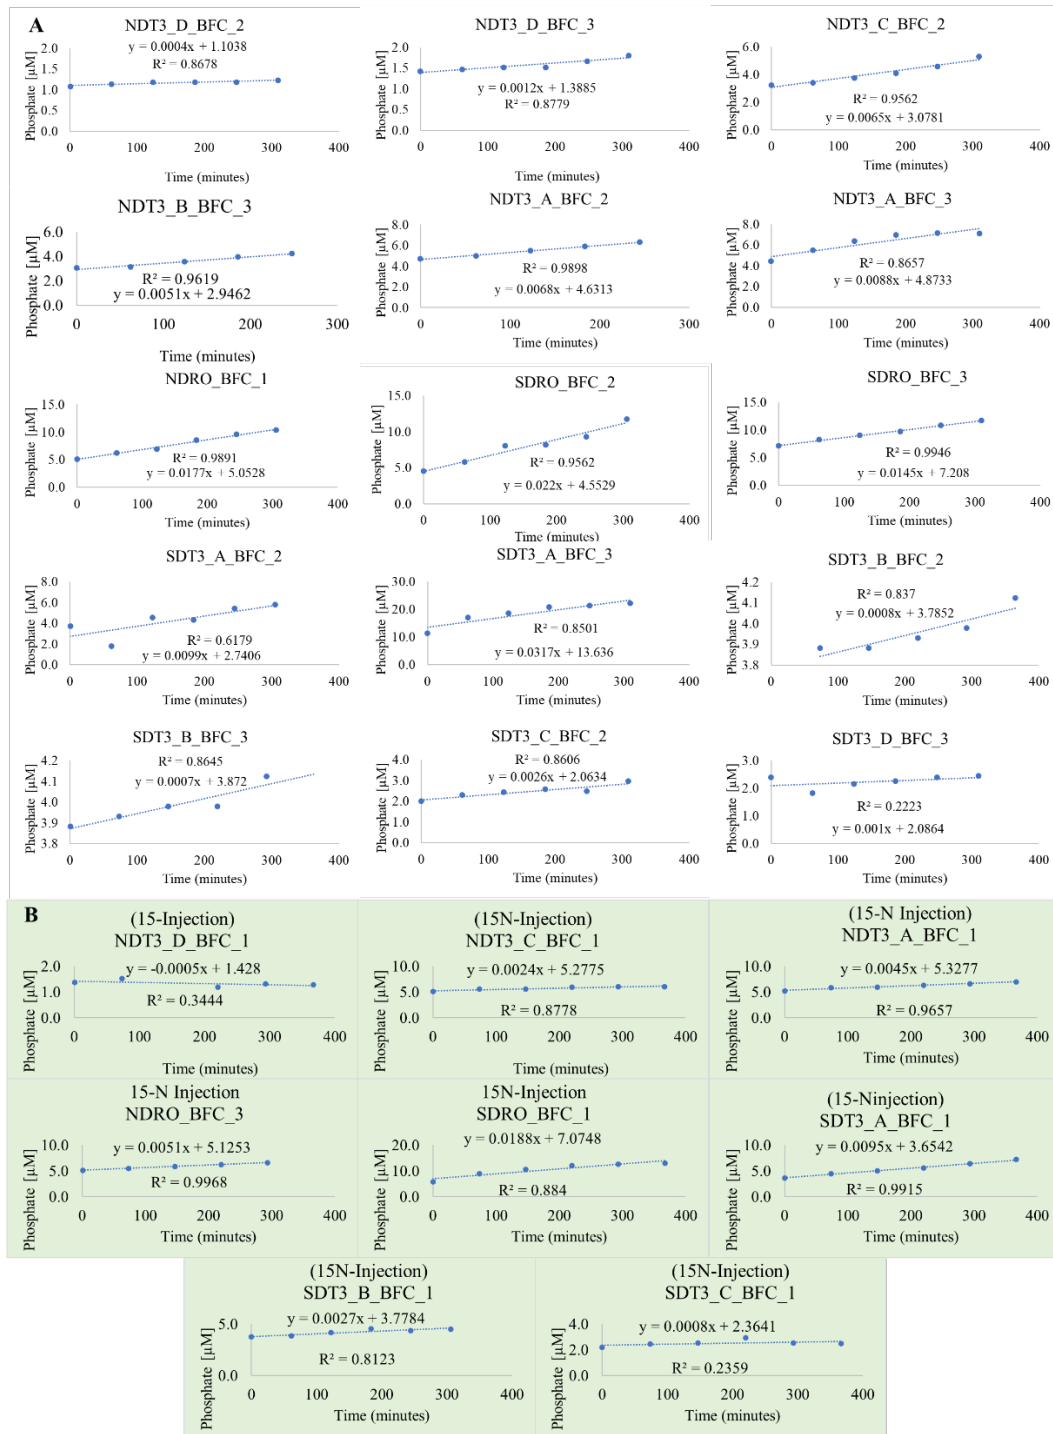

**Supplemental Figure 4:** A/white) Phosphate concentration changes over time from benthic flux chamber (BFC1, BFC2, BFC3) incubations. B/green) Phosphate concentration changes over time from <sup>15</sup>N-Nitrate benthic flux chamber incubations. Note these chambers were not used to calculate benthic fluxes. No data are shown from chambers if there was a mechanical failure with the deployment or concentrations were all below detection. For station abbreviation definitions please refer to the main manuscript.

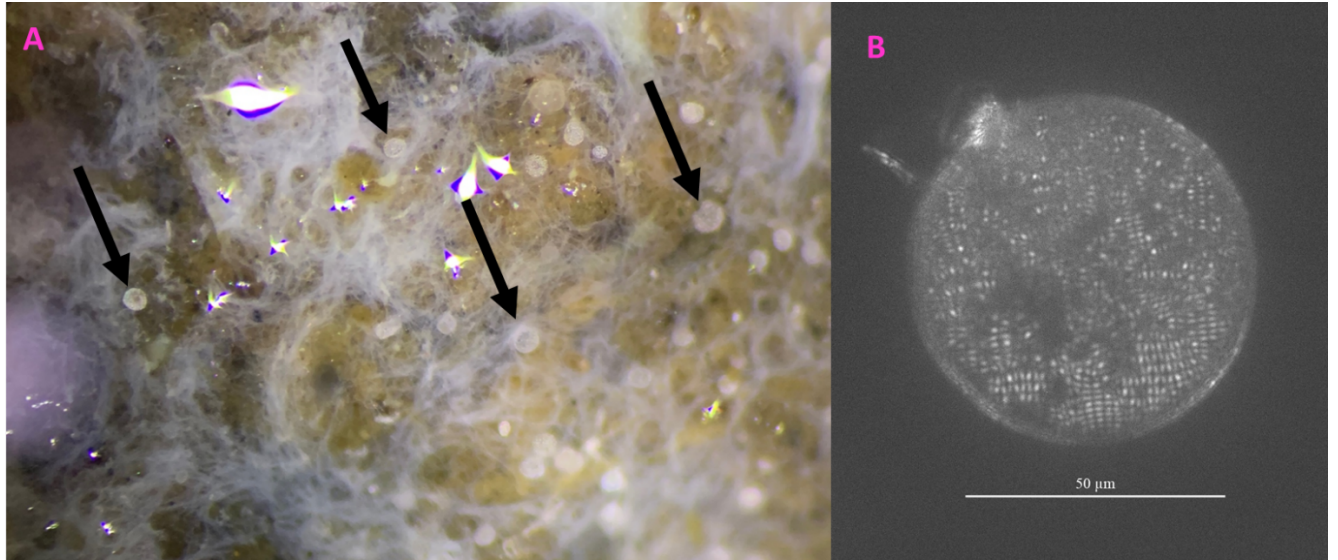

**Supplementary Figure 5.** A) Photograph of spherical sulfur bacteria mats (nicknamed 'ghost balls') within a mat of filamentous sulfur bacteria as seen through a dissection microscope. Black arrows point to a few of the ghost balls. B) Light Microscopy image of representative ghost ball with a scale bar. Ghost Balls were sampled from the 0-1 cm section of a core collected from station NDRO. The size of the ghost ball radius ranges between approx. 24.0 – 49.8  $\mu\text{m}$  ( $n = 8$ ).
